# Supplementary material
Source: PubMed Central journal article supplement (PMC3286316)
Supplement: supp_111.185579_jpet_185579_suppl_figure_1.pdf [file supp_111.185579_jpet_185579_suppl_figure_1.pdf]

**A fibrinogen-derived peptide provides ICAM-1-specific targeting and intra-endothelial transport of polymer nanocarriers in human cell cultures and mice**

Carmen Garnacho, Daniel Serrano, and Silvia Muro

Journal of Pharmacology and Experimental Therapeutics

JPET #185579

# Supplemental Figure 1

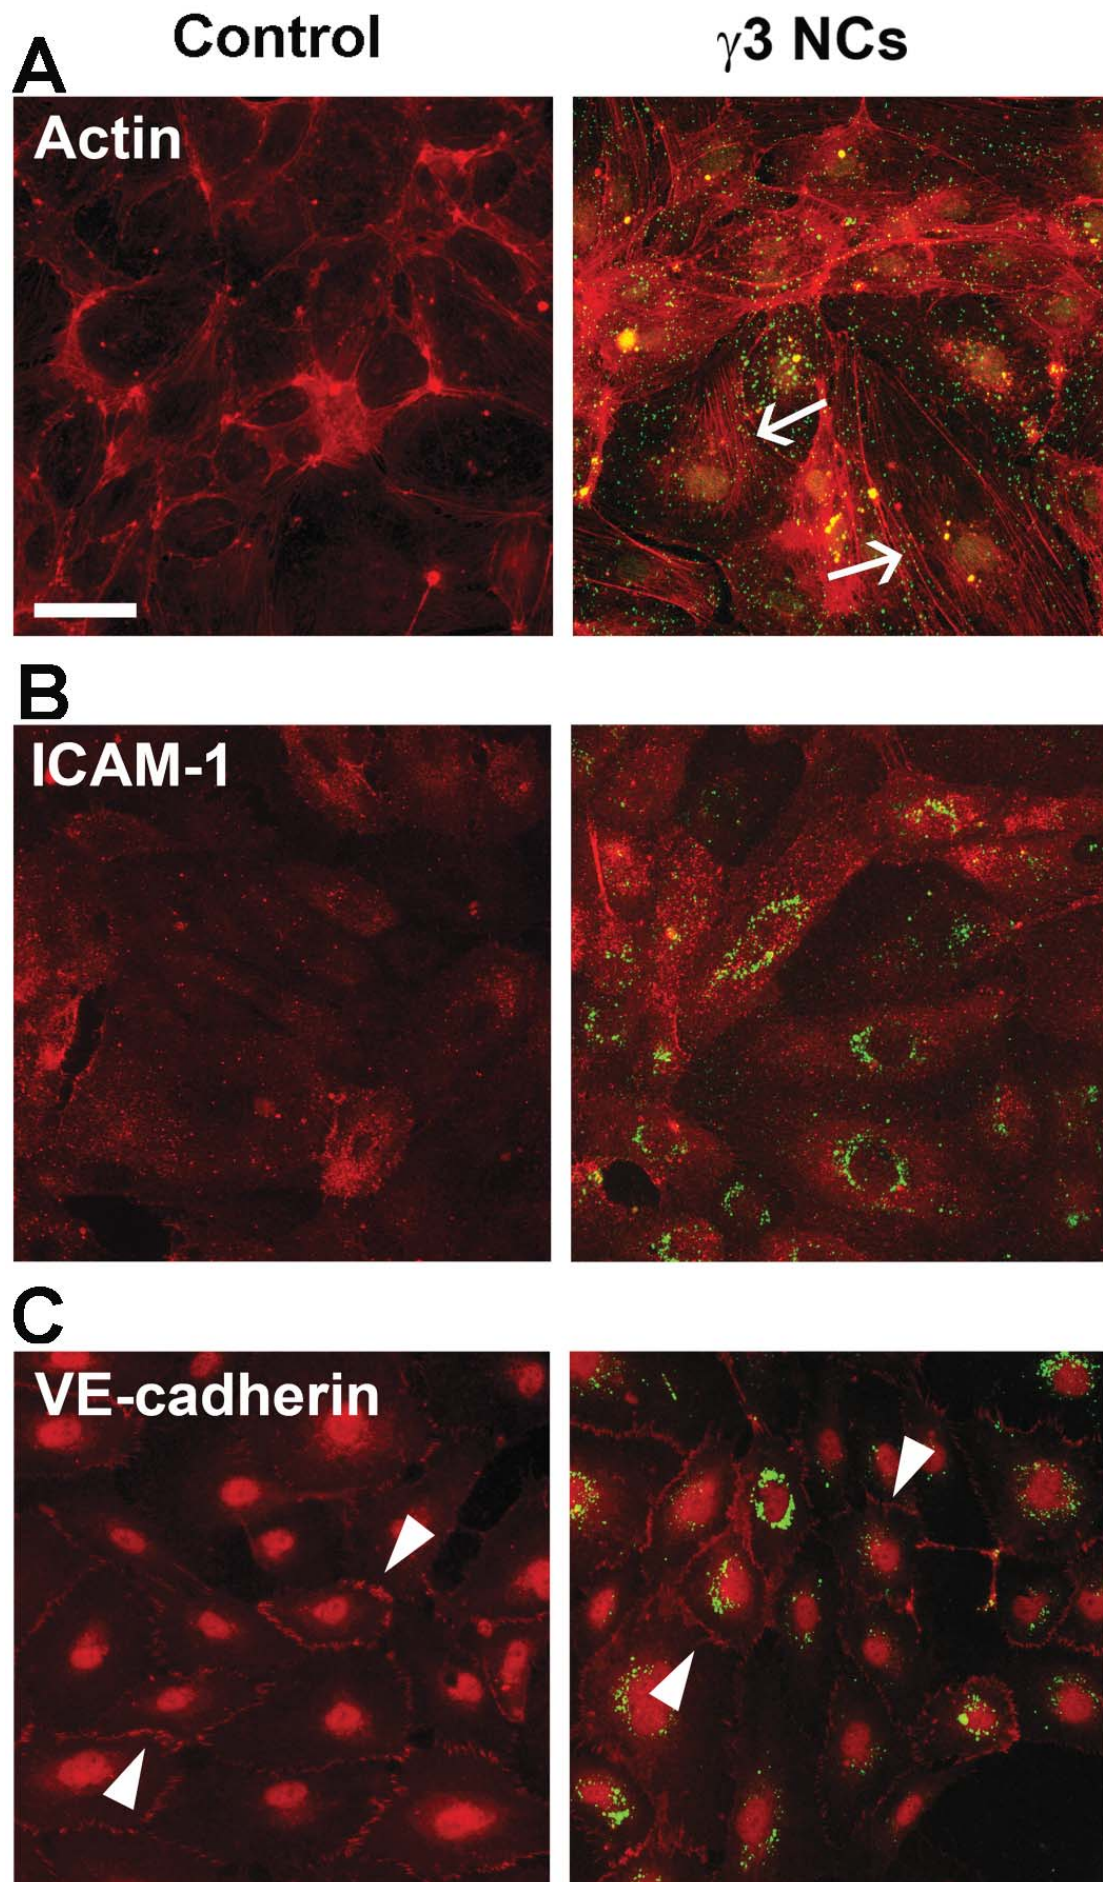

**Supplementary Figure 1. Effects of  $\gamma$ 3-targeted nanocarriers on endothelial cells.** A: TNF $\alpha$ -activated HUVECs were incubated for 30 min at 37°C in the absence (Control) or presence of green FITC-labeled  $\gamma$ 3/IgG NCs. Cells were then washed, fixed, permeabilized, and stained using red Alexa Fluor 594-labeled phalloidin to visualize F-actin. Arrows mark the presence of actin stress fibers. B-C: Non-activated HUVECs were incubated for 5 h at 37°C in the absence (Control) or presence of green FITC-labeled  $\gamma$ 3/IgG NCs. B: Surface ICAM-1 was immunostained after cell fixation using red phycoerythrin-labeled anti-ICAM (clone LB2). C: Endothelial adherens junctions were immunostained after cell fixation and permeabilization, using rabbit anti-VE-cadherin followed by a blue Alexa Fluor 355-labeled goat anti-rabbit IgG. Arrowheads mark cell-cell junctions. Scale bar: 40  $\mu$ m.
